# Supplementary material for: Achieving nitrogen-doped carbon/MnO2 nanocomposites for catalyzing the oxygen reduction reaction
Source: Royal Society of Chemistry journal article supplement (doi:10.1039/c8dt04635b), 2019-01-01
Supplement: c8dt04635b1.pdf [file c8dt04635b1.pdf]

## Supporting information

**Achieving nitrogen-doped carbon/MnO<sub>2</sub> nanocomposites towards catalyzing oxygen reduction reaction**

Tingting Zhang, Liang Zhang, Xianchun Liu, Zhongcheng Mu and Shuangxi Xing \*

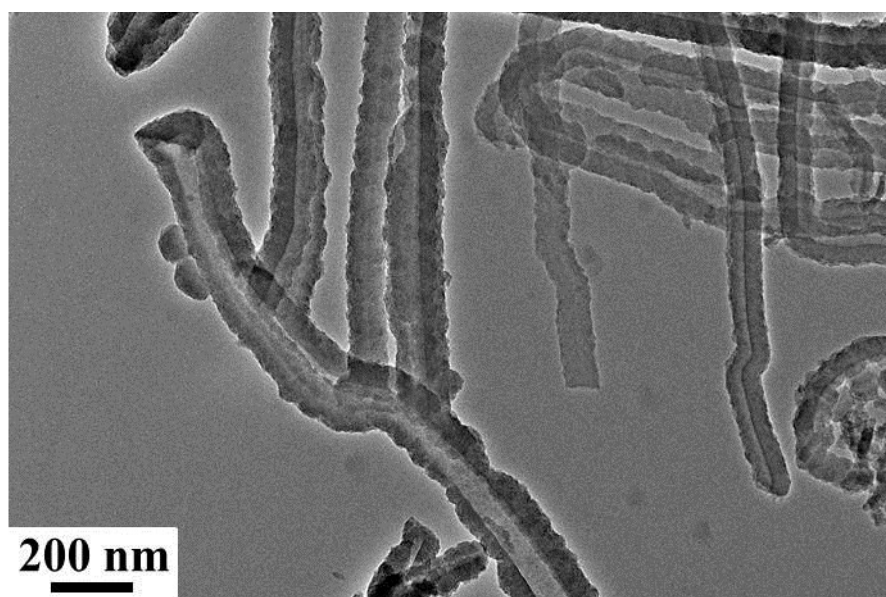

**Figure S1.** TEM images of N-C.

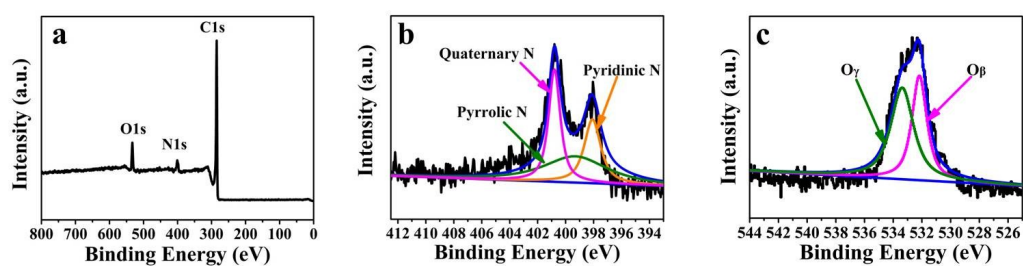

**Figure S2.** XPS survey spectrum (a), high-resolution (b) N 1s and (c) O 1s spectra of N-C.

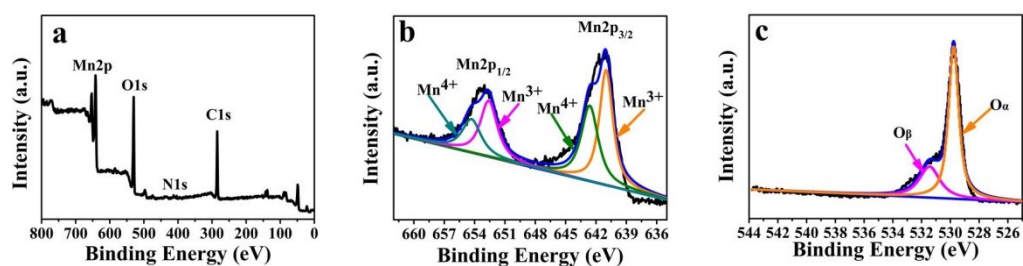

**Figure S3.** XPS survey spectrum (a), high-resolution (b) Mn 2p and (c) O 1s spectra of MnO<sub>2</sub>.

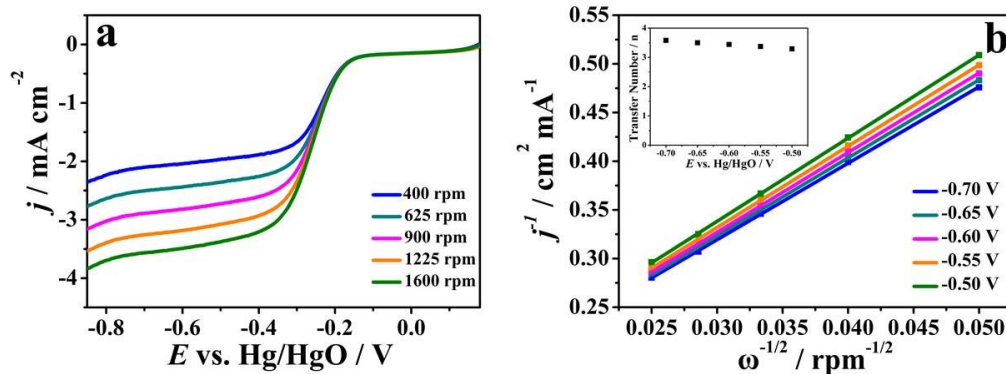

**Figure S4.** (a) LSV curves of N-C measured at different rotating rates; (b) Corresponding K-L plots of N-C in various potential range (vs. Hg/HgO, the inset gives the calculated electron transfer number at various potentials).

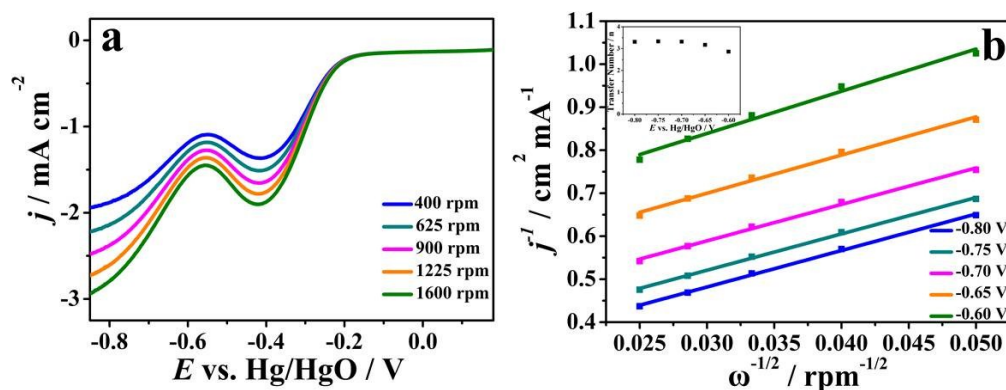

**Figure S5.** (a) LSV curves of MnO<sub>2</sub> measured at different rotating rates; (b) Corresponding K-L plots of MnO<sub>2</sub> in various potential range (vs. Hg/HgO, the inset gives the calculated electron transfer number at various potentials).

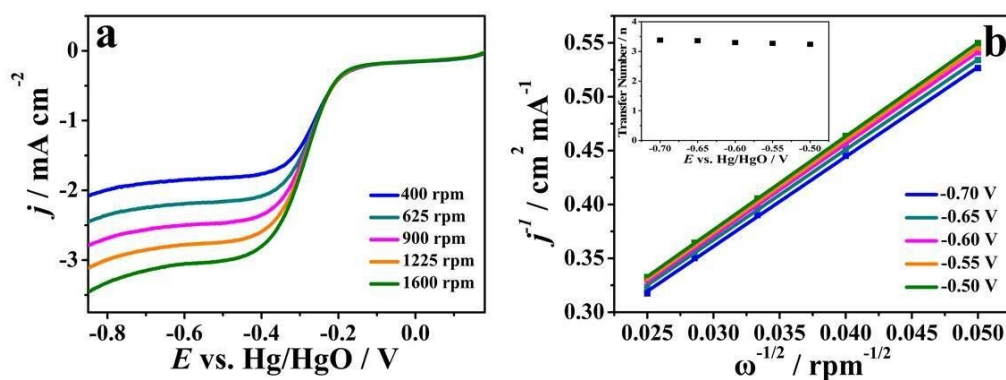

**Figure S6.** (a) LSV curves of N-C+MnO<sub>2</sub> measured at different rotating rates; (b) Corresponding K-L plots of N-C+MnO<sub>2</sub> in various potential range (vs. Hg/HgO, the inset gives the calculated electron transfer number at various potentials).

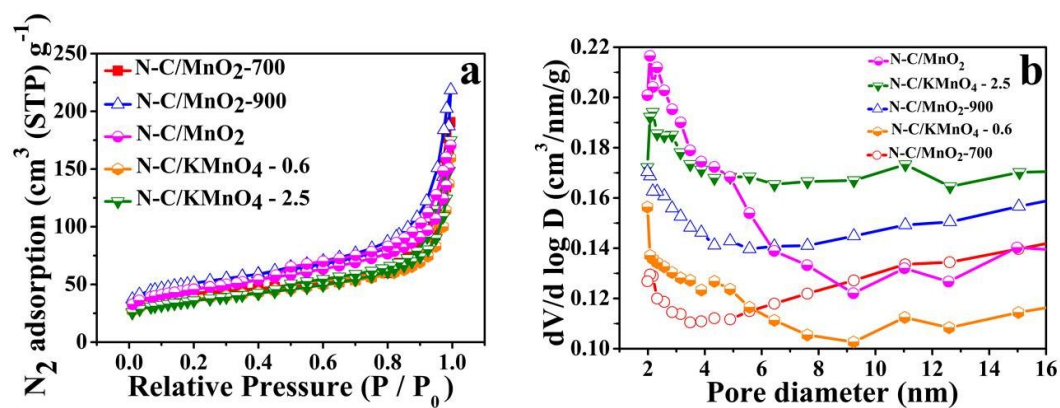

**Figure S7.** (a) Nitrogen adsorption-desorption isotherms and (b) corresponding pore size distributions of different samples.

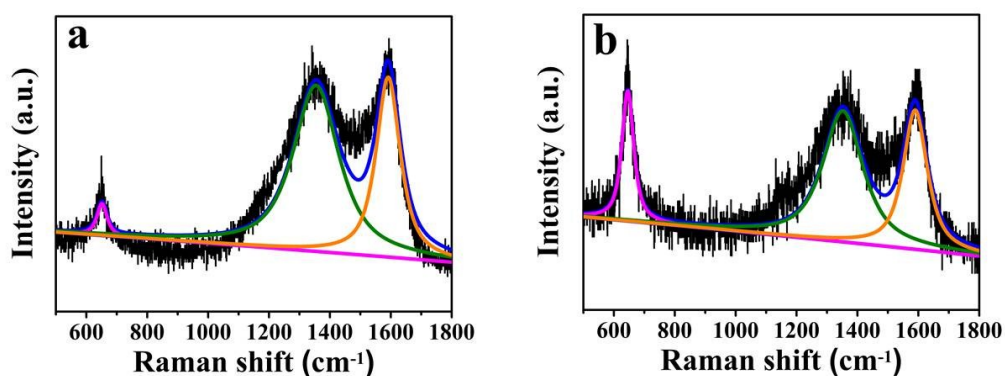

**Figure S8.** Raman spectra of N-C/MnO<sub>2</sub>-700 (a) and N-C/MnO<sub>2</sub>-900 (b).

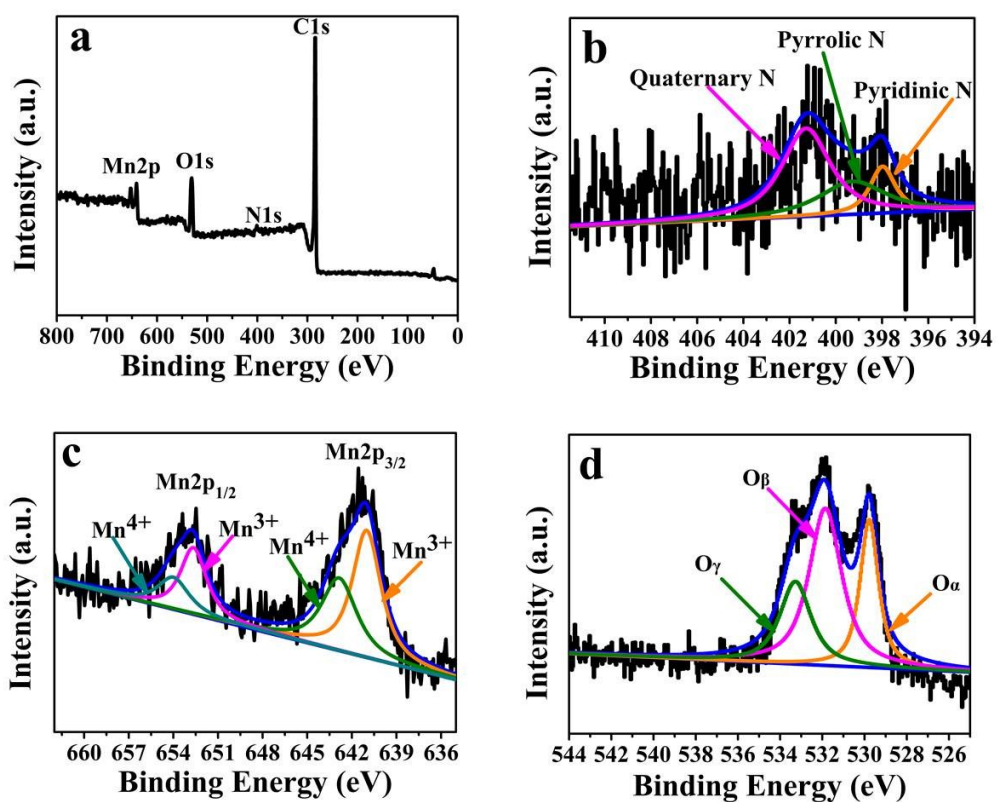

**Figure S9.** XPS survey spectrum (a) and high-resolution (b) N 1s; (c) Mn 2p and (d) O 1s spectra of N-C/MnO<sub>2</sub>-900.

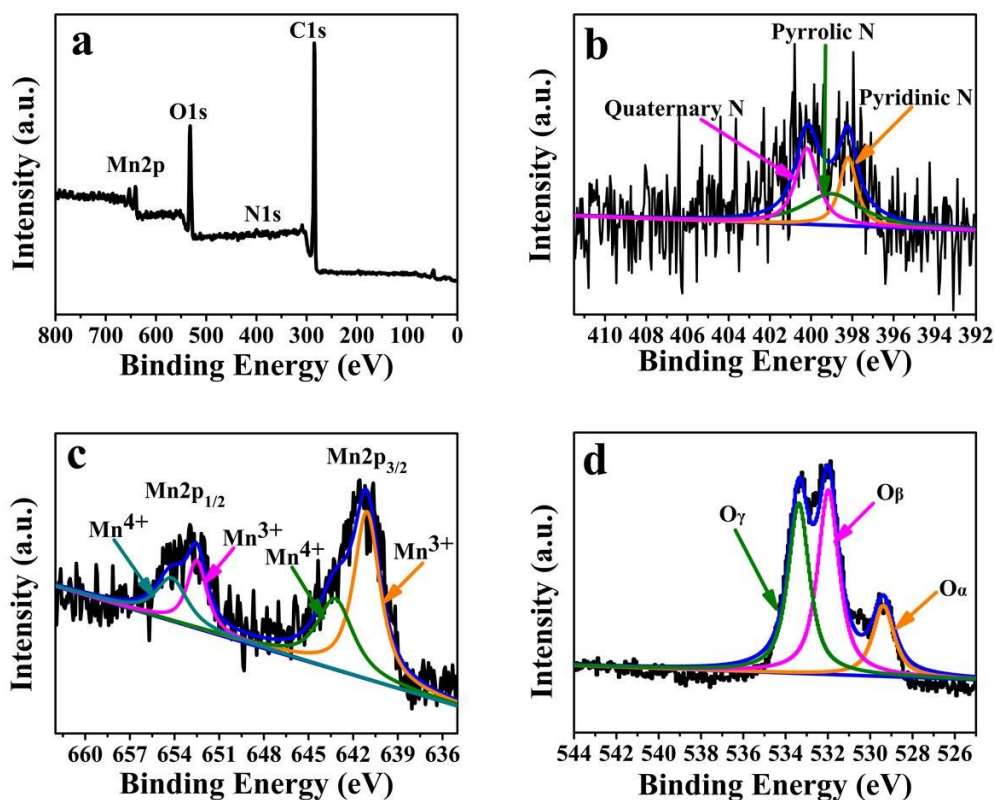

**Figure S10.** XPS survey spectrum (a) and high-resolution (b) N 1s; (c) Mn 2p and (d) O 1s spectra of N-C/MnO<sub>2</sub>-700.

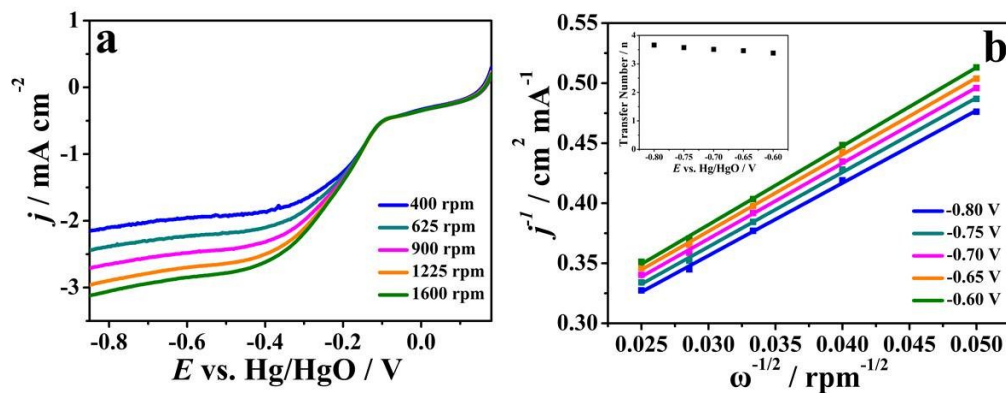

**Figure S11.** (a) LSV curves of N-C/MnO<sub>2</sub>-700 measured at different rotating rates; (b) Corresponding K-L plots of N-C/MnO<sub>2</sub>-700 in various potential range (vs. Hg/HgO, the inset gives the calculated electron transfer number at various potentials).

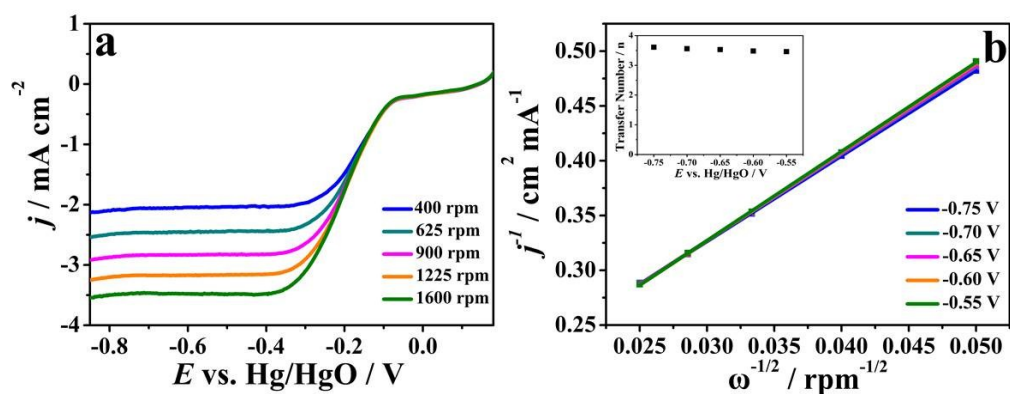

**Figure S12.** (a) LSV curves of N-C/MnO<sub>2</sub>-900 measured at different rotating rates; (b) Corresponding K-L plots of N-C/MnO<sub>2</sub>-900 in various potential range (vs. Hg/HgO, the inset gives the calculated electron transfer number at various potentials).

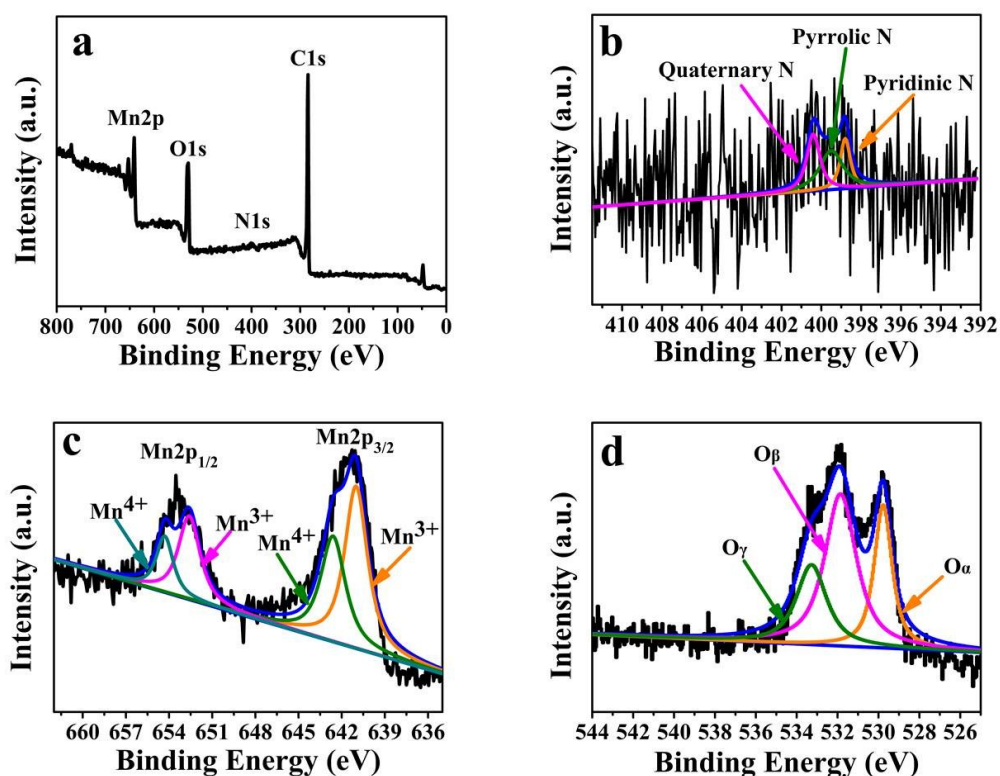

**Figure S13.** XPS survey spectrum (a) and high-resolution (b) N 1s; (c) Mn 2p and (d) O 1s spectra of N-C/MnO<sub>2</sub>-0.6.

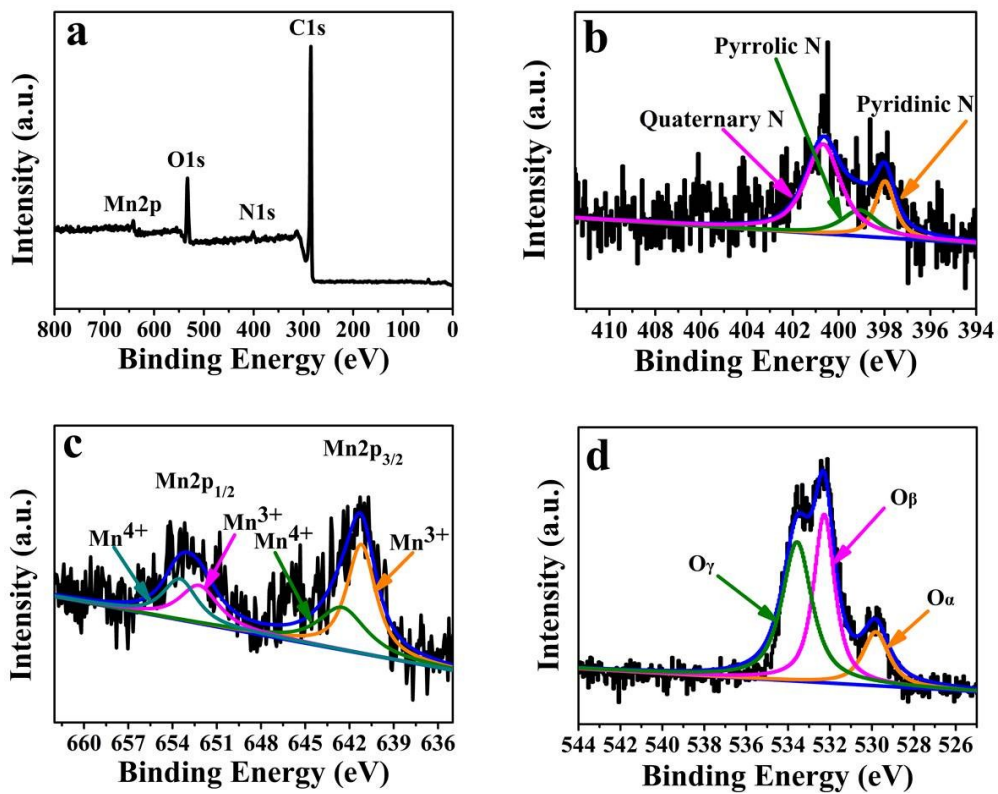

**Figure S14.** XPS survey spectrum (a) and high-resolution (b) N 1s; (c) Mn 2p and (d) O 1s spectra of N-C/MnO<sub>2</sub>-2.5.

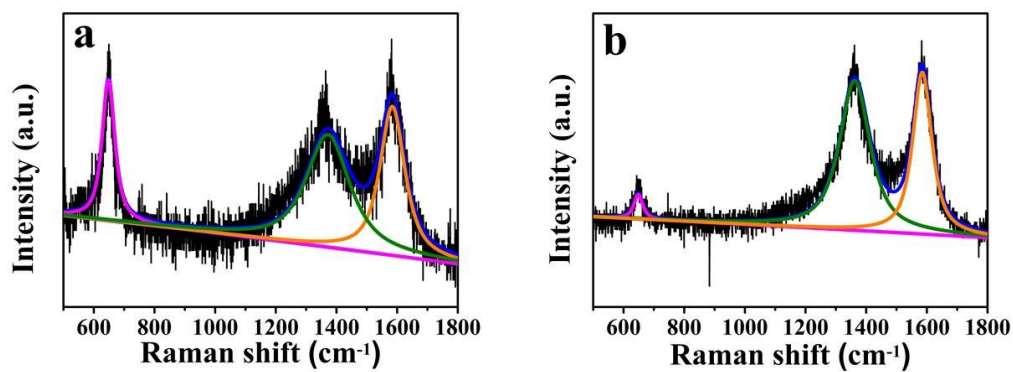

**Figure S15.** Raman spectra of N-C/MnO<sub>2</sub>-0.6 (a) and N-C/MnO<sub>2</sub>-2.5 (b).



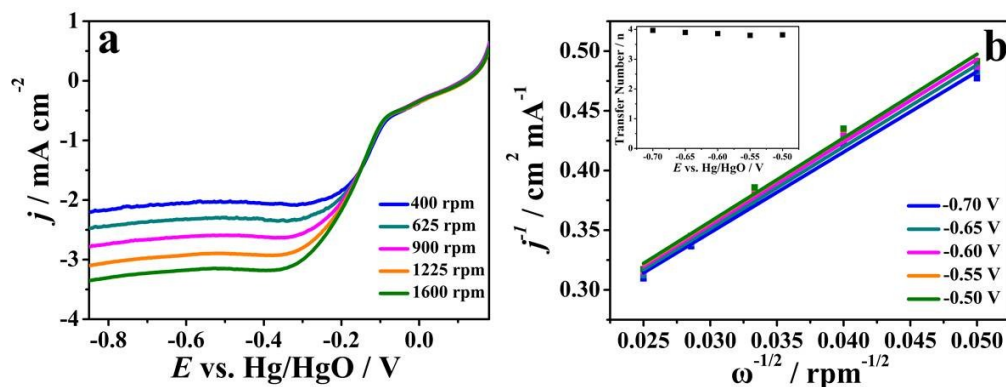

**Figure S16.** (a) LSV curves of N-C/MnO<sub>2</sub>-0.6 measured at different rotating rates; (b) Corresponding K-L plots of N-C/MnO<sub>2</sub>-0.6 in various potential range (vs. Hg/HgO, the inset gives the calculated electron transfer number at various potentials).

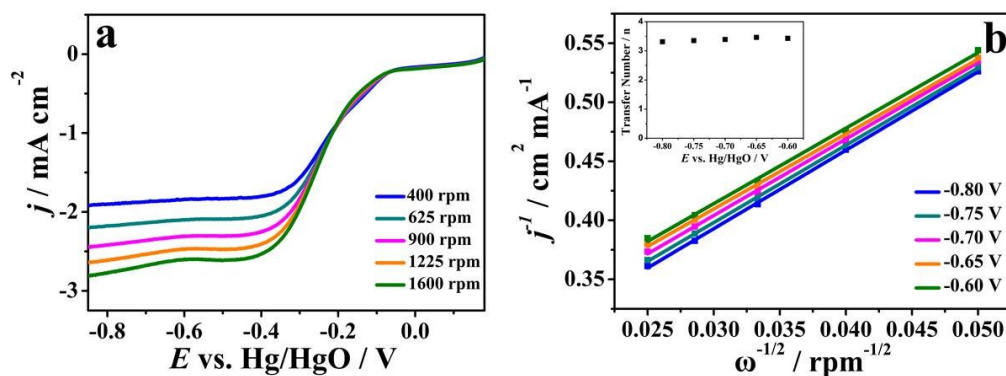

**Figure S17.** (a) LSV curves of N-C/MnO<sub>2</sub>-2.5 measured at different rotating rates; (b) Corresponding K-L plots of N-C/MnO<sub>2</sub>-2.5 in various potential range (vs. Hg/HgO, the inset gives the calculated electron transfer number at various potentials).
